# Supplementary material for: Structural Motifs in Aryl Organogermanium Ge-O Derivatives for Material Design
Source: MDPI journal article supplement (doi:10.3390/ijms241713575), 2023-09-01
Supplement: s1 [file s1]

## SUPPORTING INFORMATION

for

### Structural Motifs in Aryl Organogermanium Ge-O Derivatives for Materials Design

#### Table of Contents

##### NMR Spectral Data

|                                                                                                                                                          |    |
|----------------------------------------------------------------------------------------------------------------------------------------------------------|----|
| <b>Figure S1.</b> $^1\text{H}$ NMR spectrum of $[(p\text{-FC}_6\text{H}_4)_3\text{Ge}]_2\text{O}$ ( <b>1</b> ) ( $\text{CDCl}_3$ , RT).....              | S2 |
| <b>Figure S2.</b> $^{13}\text{C}$ NMR spectrum of $[(p\text{-FC}_6\text{H}_4)_3\text{Ge}]_2\text{O}$ ( <b>1</b> ) ( $\text{CDCl}_3$ , RT).....           | S3 |
| <b>Figure S3.</b> $^{19}\text{F}$ NMR spectrum of $[(p\text{-FC}_6\text{H}_4)_3\text{Ge}]_2\text{O}$ ( <b>1</b> ) ( $\text{CDCl}_3$ , RT).....           | S4 |
| <b>Figure S4.</b> $^1\text{H}$ NMR spectrum of $[(p\text{-F}_3\text{CC}_6\text{H}_4)_3\text{Ge}]_2\text{O}$ ( <b>2</b> ) ( $\text{CDCl}_3$ , RT).....    | S5 |
| <b>Figure S5.</b> $^{13}\text{C}$ NMR spectrum of $[(p\text{-F}_3\text{CC}_6\text{H}_4)_3\text{Ge}]_2\text{O}$ ( <b>2</b> ) ( $\text{CDCl}_3$ , RT)..... | S6 |
| <b>Figure S6.</b> $^{19}\text{F}$ NMR spectrum of $[(p\text{-F}_3\text{CC}_6\text{H}_4)_3\text{Ge}]_2\text{O}$ ( <b>2</b> ) ( $\text{CDCl}_3$ , RT)..... | S7 |

##### X-Ray Diffraction Analysis Data

|                                                                                                                                                                                                                                         |     |
|-----------------------------------------------------------------------------------------------------------------------------------------------------------------------------------------------------------------------------------------|-----|
| <b>Table S1.</b> The crystallographic data for compounds<br>$[(p\text{-FC}_6\text{H}_4)_3\text{Ge}]_2\text{O}$ ( <b>1</b> ), $[(p\text{-F}_3\text{CC}_6\text{H}_4)_3\text{Ge}]_2\text{O}$ ( <b>2</b> ) (structural type <b>A</b> )..... | S8  |
| <b>Table S2.</b> The crystallographic data for compound<br><i>cyclo</i> - $[(p\text{-F}_3\text{CC}_6\text{H}_4)_2\text{GeO}]_4$ ( <b>3</b> ) (structural type <b>F</b> ).....                                                           | S9  |
| <b>Table S3.</b> The crystallographic data for compound<br>$[(p\text{-F}_3\text{CC}_6\text{H}_4)_3\text{GeO}]_4\text{Ge}$ ( <b>4</b> ) (structural type <b>K</b> ).....                                                                 | S10 |

### NMR Spectral Data

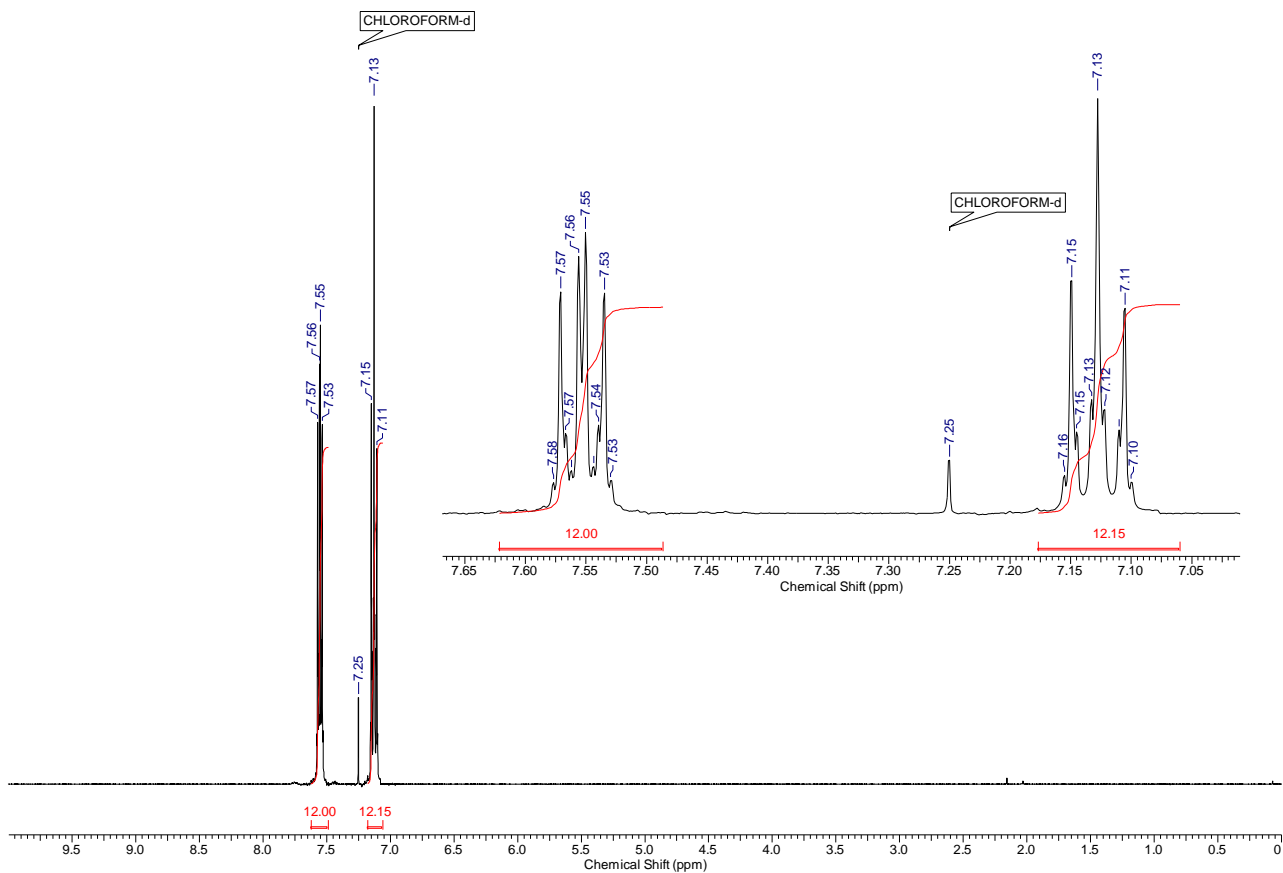

**Figure S1.**  $^1\text{H}$  NMR spectrum of  $[(p\text{-FC}_6\text{H}_4)_3\text{Ge}]_2\text{O}$  (1) ( $\text{CDCl}_3$ , RT).

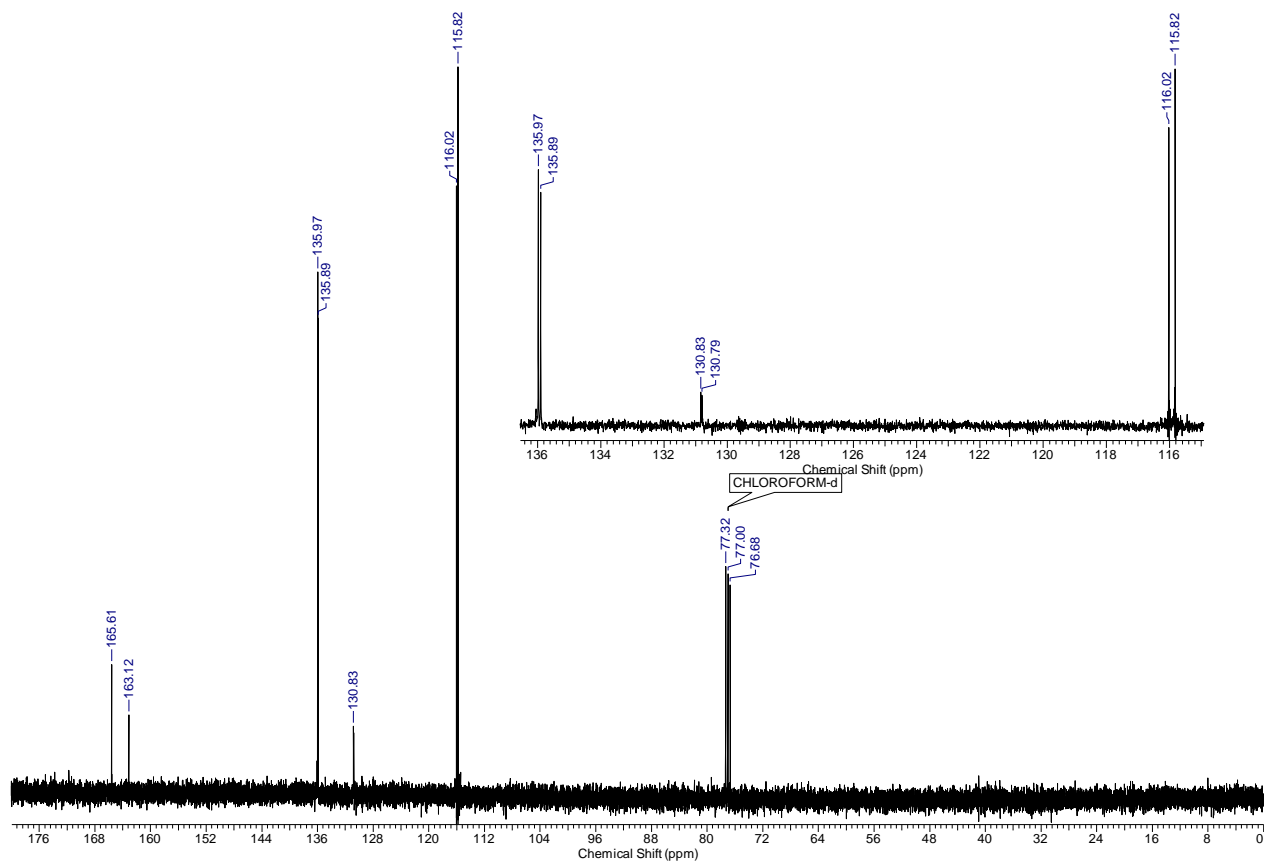

**Figure S2.**  $^{13}\text{C}$  NMR spectrum of  $[(p\text{-FC}_6\text{H}_4)_3\text{Ge}]_2\text{O}$  (**1**) ( $\text{CDCl}_3$ , RT).

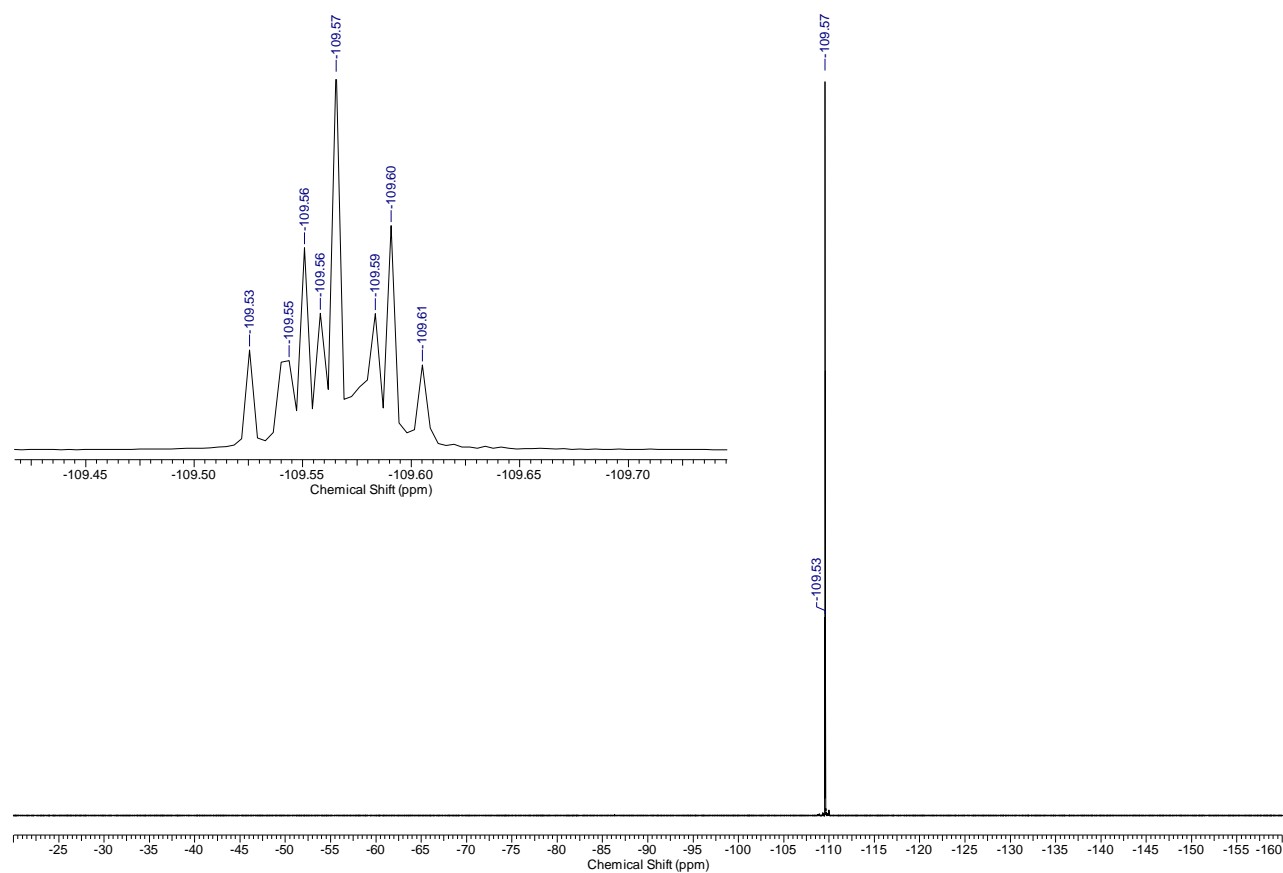

**Figure S3.**  $^{19}\text{F}$  NMR spectrum of  $[(p\text{-FC}_6\text{H}_4)_3\text{Ge}]_2\text{O}$  (1) ( $\text{CDCl}_3$ , RT).

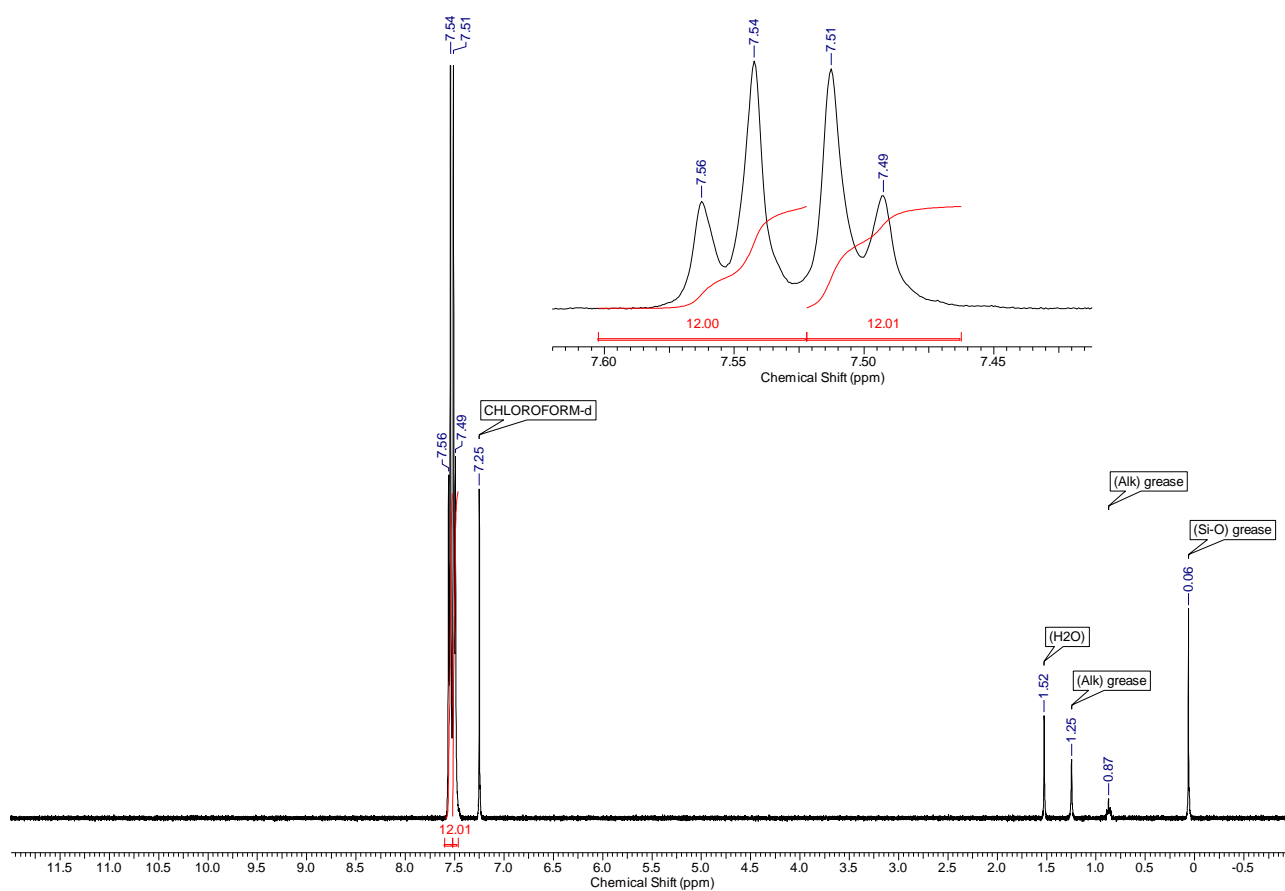

**Figure S4.**  $^1\text{H}$  NMR spectrum of  $[(p\text{-F}_3\text{CC}_6\text{H}_4)_3\text{Ge}]_2\text{O}$  (**2**) ( $\text{CDCl}_3$ , RT).

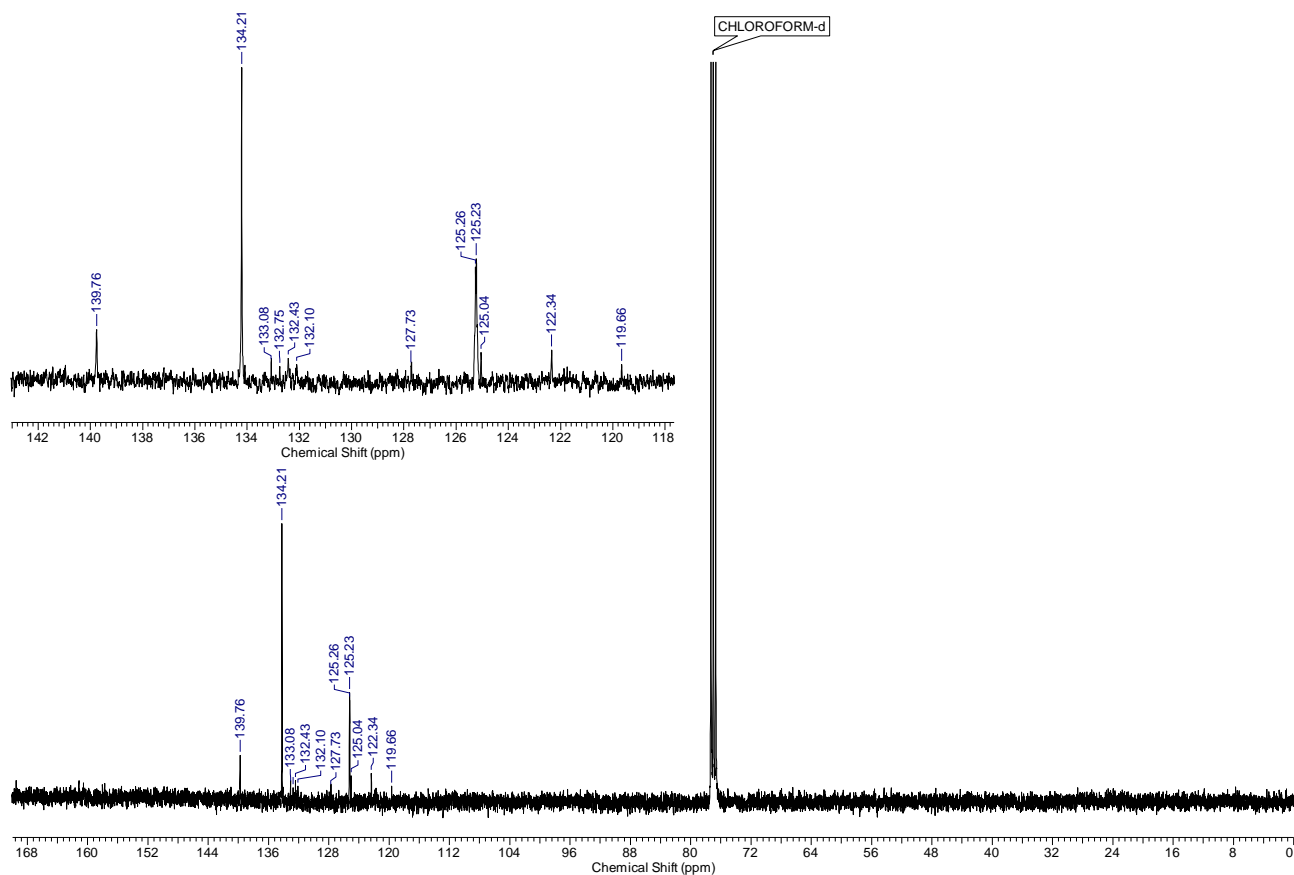

**Figure S5.**  $^{13}\text{C}$  NMR spectrum of  $[(p\text{-F}_3\text{CC}_6\text{H}_4)_3\text{Ge}]_2\text{O}$  (**2**) ( $\text{CDCl}_3$ , RT).

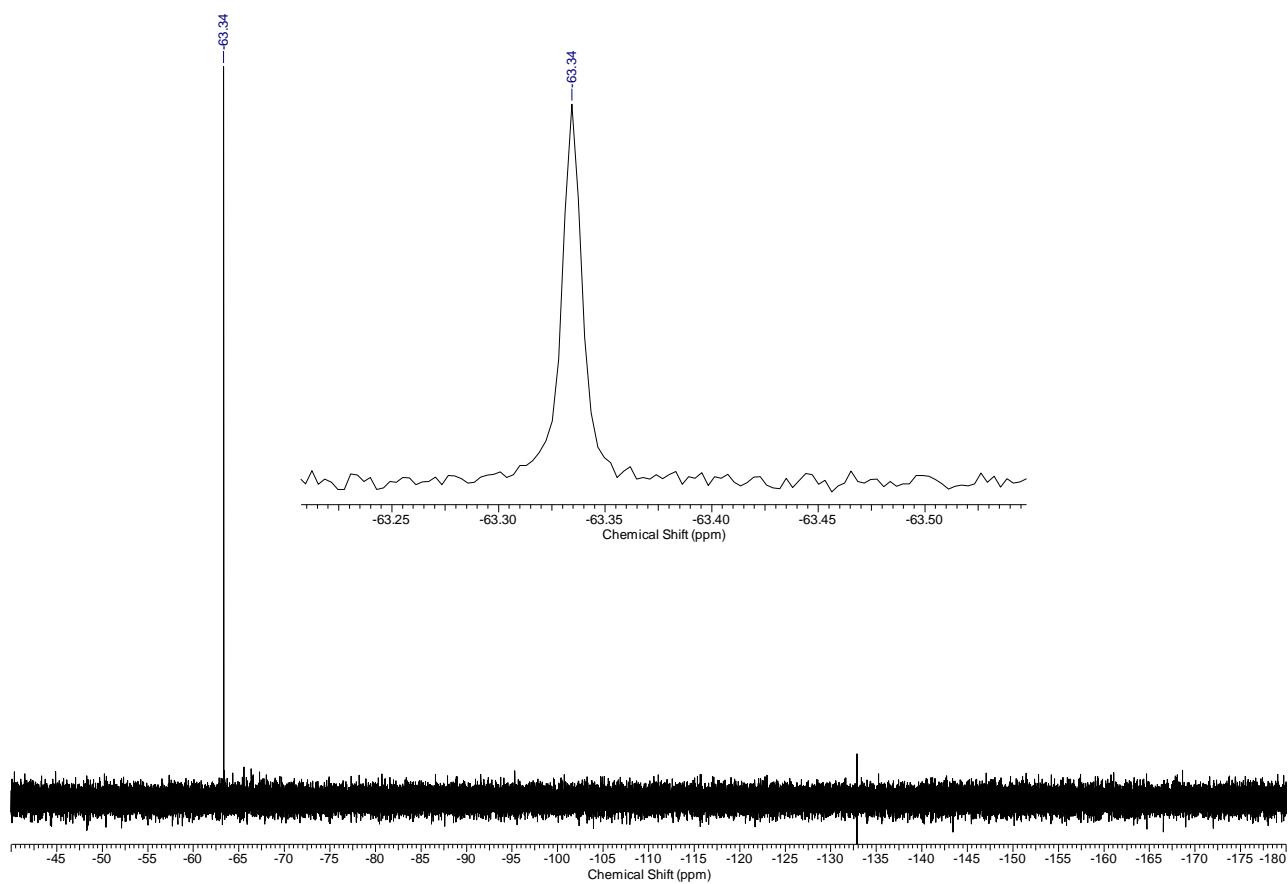

**Figure S6.**  $^{19}\text{F}$  NMR spectrum of  $[(p\text{-F}_3\text{CC}_6\text{H}_4)_3\text{Ge}]_2\text{O}$  (**2**) ( $\text{CDCl}_3$ , RT).

**X-Ray Diffraction Analysis Data**

**Table S1.** The crystallographic data for compounds [(*p*-FC<sub>6</sub>H<sub>4</sub>)<sub>3</sub>Ge]<sub>2</sub>O (**1**), [(*p*-F<sub>3</sub>CC<sub>6</sub>H<sub>4</sub>)<sub>3</sub>Ge]<sub>2</sub>O (**2**) (structural type **A**).

|                                                     | <b>1</b>                                                            | <b>2</b>                                                            |
|-----------------------------------------------------|---------------------------------------------------------------------|---------------------------------------------------------------------|
| empirical formula                                   | C <sub>36</sub> H <sub>24</sub> F <sub>6</sub> Ge <sub>2</sub> O    | C <sub>42</sub> H <sub>24</sub> F <sub>18</sub> Ge <sub>2</sub> O   |
| $M_w$                                               | 731.73                                                              | 1031.79                                                             |
| temperature (K)                                     | 120                                                                 | 150                                                                 |
| size (mm)                                           | 0.15 x 0.10 x 0.08                                                  | 0.21 x 0.15 x 0.10                                                  |
| cryst. system                                       | monoclinic                                                          | monoclinic                                                          |
| space group                                         | <i>C2/c</i>                                                         | <i>P2<sub>1</sub>/c</i>                                             |
| <i>a</i> (Å)                                        | 9.7200(4)                                                           | 16.4116(13)                                                         |
| <i>b</i> (Å)                                        | 20.9864(8)                                                          | 18.5115(14)                                                         |
| <i>c</i> (Å)                                        | 15.2582(6)                                                          | 13.8675(11)                                                         |
| $\beta$ (deg)                                       | 99.143(1)                                                           | 107.325(1)                                                          |
| <i>V</i> (Å <sup>3</sup> )                          | 3072.9(2)                                                           | 4021.9(5)                                                           |
| <i>Z</i>                                            | 4                                                                   | 4                                                                   |
| $\rho_{\text{cald}}$ (g*cm <sup>-3</sup> )          | 1.582                                                               | 1.704                                                               |
| abs coeff. (mm <sup>-1</sup> )                      | 2.022                                                               | 1.613                                                               |
| <i>F</i> (000)                                      | 1464                                                                | 2040                                                                |
| $\theta$ range (deg)                                | 2.33 - 28.00                                                        | 2.54 - 27.00                                                        |
| no. of collected/unique rflns.                      | 12118 / 3681                                                        | 31468 / 8762                                                        |
| <i>R</i> <sub>int</sub>                             | 0.0193                                                              | 0.0549                                                              |
| data/restraints/params.                             | 3681 / 9 / 272                                                      | 8762 / 1026 / 838                                                   |
| goodness of fit on <i>F</i> <sup>2</sup>            | 1.074                                                               | 1.107                                                               |
| final <i>R</i> indices ( <i>I</i> > 2σ( <i>I</i> )) | <i>R</i> <sub>1</sub> = 0.0552,<br>w <i>R</i> <sub>2</sub> = 0.1196 | <i>R</i> <sub>1</sub> = 0.0412,<br>w <i>R</i> <sub>2</sub> = 0.0925 |
| <i>R</i> indices (all data)                         | <i>R</i> <sub>1</sub> = 0.0701,<br>w <i>R</i> <sub>2</sub> = 0.1298 | <i>R</i> <sub>1</sub> = 0.0637,<br>w <i>R</i> <sub>2</sub> = 0.1020 |
| largest diff. peak/hole (e/Å <sup>3</sup> )         | 1.754 / -1.771                                                      | 0.766 / -0.715                                                      |



**Table S2.** The crystallographic data for compound *cyclo*-[(*p*-F<sub>3</sub>CC<sub>6</sub>H<sub>4</sub>)<sub>2</sub>GeO]<sub>4</sub> (**3**)  
(structural type **F**).

|                                                     |                                                                                |
|-----------------------------------------------------|--------------------------------------------------------------------------------|
| empirical formula                                   | C <sub>56</sub> H <sub>32</sub> F <sub>24</sub> Ge <sub>4</sub> O <sub>4</sub> |
| $M_w$                                               | 1515.17                                                                        |
| temperature (K)                                     | 120                                                                            |
| size (mm)                                           | 0.30 x 0.20 x 0.20                                                             |
| cryst. system                                       | tetragonal                                                                     |
| space group                                         | <i>I</i> 4 <sub>1</sub> /a                                                     |
| <i>a</i> (Å)                                        | 11.2193(5)                                                                     |
| <i>c</i> (Å)                                        | 44.188(4)                                                                      |
| <i>V</i> (Å <sup>3</sup> )                          | 5562.1(7)                                                                      |
| <i>Z</i>                                            | 4                                                                              |
| $\rho_{\text{cald}}$ (g*cm <sup>-3</sup> )          | 1.809                                                                          |
| abs coeff. (mm <sup>-1</sup> )                      | 2.269                                                                          |
| <i>F</i> (000)                                      | 2976                                                                           |
| $\theta$ range (deg)                                | 2.57 - 27.99                                                                   |
| no. of collected/unique rflns.                      | 14852 / 3351                                                                   |
| <i>R</i> <sub>int</sub>                             | 0.0786                                                                         |
| data/restraints/params.                             | 3351 / 282 / 234                                                               |
| goodness of fit on <i>F</i> <sup>2</sup>            | 1.144                                                                          |
| final <i>R</i> indices ( <i>I</i> > 2σ( <i>I</i> )) | <i>R</i> <sub>1</sub> = 0.1030,<br>w <i>R</i> <sub>2</sub> = 0.2147            |
| <i>R</i> indices (all data)                         | <i>R</i> <sub>1</sub> = 0.1170,<br>w <i>R</i> <sub>2</sub> = 0.2218            |
| largest diff. peak/hole (e/Å <sup>3</sup> )         | 1.002 / -1.015                                                                 |

**Table S3.** The crystallographic data for compound [(*p*-F<sub>3</sub>CC<sub>6</sub>H<sub>4</sub>)<sub>3</sub>GeO]<sub>4</sub>Ge (**4**) (structural type **K**).

|                                             |                                                                                                                   |
|---------------------------------------------|-------------------------------------------------------------------------------------------------------------------|
| empirical formula                           | C <sub>84</sub> H <sub>48</sub> F <sub>36</sub> Ge <sub>5</sub> O <sub>4</sub> *2(C <sub>6</sub> H <sub>6</sub> ) |
| $F_w$                                       | 2324.39                                                                                                           |
| temperature (K)                             | 183                                                                                                               |
| size (mm)                                   | 0.25 x 0.25 x 0.20                                                                                                |
| cryst. system                               | tetragonal                                                                                                        |
| space group                                 | $P4_32_12$                                                                                                        |
| $a$ (Å)                                     | 16.5336(8)                                                                                                        |
| $c$ (Å)                                     | 34.892(3)                                                                                                         |
| $V$ (Å <sup>3</sup> )                       | 9538.1(9)                                                                                                         |
| $Z$                                         | 4                                                                                                                 |
| $\rho_{\text{cald}}$ (g*cm <sup>-3</sup> )  | 1.619                                                                                                             |
| abs coeff. (mm <sup>-1</sup> )              | 1.679                                                                                                             |
| $F(000)$                                    | 4608                                                                                                              |
| $\theta$ range (deg)                        | 2.10 - 27.00                                                                                                      |
| no. of collected/unique rflns.              | 92313 / 10419                                                                                                     |
| $R_{\text{int}}$                            | 0.0416                                                                                                            |
| data/restraints/params.                     | 10419 / 1194 / 894                                                                                                |
| goodness of fit on $F^2$                    | 1.108                                                                                                             |
| final $R$ indices ( $I > 2\sigma(I)$ )      | $R_1 = 0.0445$ ,<br>$wR_2 = 0.1199$                                                                               |
| $R$ indices (all data)                      | $R_1 = 0.0528$ ,<br>$wR_2 = 0.1199$                                                                               |
| largest diff. peak/hole (e/Å <sup>3</sup> ) | 0.809 / -0.561                                                                                                    |
| Flack param.                                | 0.001(3)                                                                                                          |
